# Supplementary material for: Recruitment of Glycosyl Hydrolase Proteins in a Cone Snail Venomous Arsenal: Further Insights into Biomolecular Features of Conus Venoms
Source: Mar Drugs. 2012 Jan 31;10(2):258–80. doi: 10.3390/md10020258 (PMC3296996; doi:10.3390/md10020258)
Supplement: Supplementary File 1: — PDF-Document (PDF, 155 KB) [file marinedrugs-10-00258-s001.pdf]

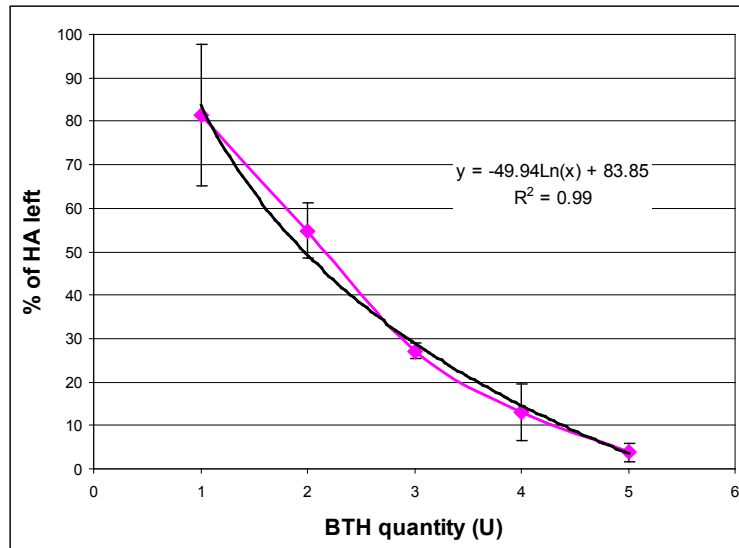

**Supplementary Figure S1:** percentage of hyaluronic acid (HA) left as a function of bovine testicular hyaluronidase quantity in U (calculated from the specific activity value provided by the supplier) and its trend curve using a logarithmic fit.

|                       |                                                                |     |
|-----------------------|----------------------------------------------------------------|-----|
| sp Q12794 HYAL1_HUMAN | -----MAAHLPLICALFTLLDMAQGFRG----PLLPNRPFTTVWNANTQWCLER-HG      | 48  |
| sp O35632 HYAL2_MOUSE | -----MRAGLGPIITLALVLEVAWAGELKPTAPPIFTGRPFVVAWNVPTQECAPR-HK     | 52  |
| sp Q08169 HUGA_APIME  | MSRPLVITEGMMIGVLLMLAPINALLLGFVQSTPDNNKTVREFNVYWNVPFTFMCHKYGLR  | 60  |
| sp P49370 HUGAA_VESVU | -----SERPKRVFNINYWNVPFTFMCHQYDLY                               | 25  |
| Conohyal-Cn1          | -----SSSDYQGSSGDDCDEGLPPDPFVRVWNHPDNCERIK---                   | 38  |
|                       | . : * **                                                       |     |
| sp Q12794 HYAL1_HUMAN | VDVDVSVFDDVANPQGQTFRGPDMTIFYSSQLGTYPYTPTG--EPVFGGLPQNASLIAHL   | 106 |
| sp O35632 HYAL2_MOUSE | VPLDLRAFVDKATPNEGFFNQNTTFYYDRLGLYPRFDAAG--TSVHGGVPQNGSLCAHL    | 110 |
| sp Q08169 HUGA_APIME  | FEEVSEKYGILQNWMDKFRGEEIAILYDPGMFPALLKDPNGNVVARNGGVPQLGNLTKHL   | 120 |
| sp P49370 HUGAA_VESVU | FDEVTN-FNIKRNSKDDFGQDKIAIFYDPGEFPALLSLKDGKYKKRNGGVPQEGNITIHL   | 84  |
| Conohyal-Cn1          | LHLPLDDYGIIFNKLRVFLGEEIQTLYDTG--PWPIYSETG--KFIGGGLPQSFNHPDND   | 94  |
|                       | . : . * . : : *                                                |     |
| sp Q12794 HYAL1_HUMAN | ARTFQDILAAIPAPDFSGLAVIDWAWRPRWAFNWDTKDIYRQSRALVQAQHPDWPAPQ     | 166 |
| sp O35632 HYAL2_MOUSE | PMLKESVERYIQTQEPGGLAVIDWWRPVWVRNWQEKDVYRQSSRQLVASRHPDWPSPDR    | 170 |
| sp Q08169 HUGA_APIME  | QVFRDHLINQIPDKSFPQGVDFSWRPIFRQNWASLQPYKKLSVEVVRREHHPFWDQDR     | 180 |
| sp P49370 HUGAA_VESVU | QKFIEENLDKIYPNRNFSGIGVIDFWRWRPIFRQNWGNMKIHKNFISIDLVRNEHPTWNKKM | 144 |
| Conohyal-Cn1          | GETQRILKKHRPE-NFTGLGVLDFTWRAIYSTNFGPMTIYQNESVKLVKEQHPDQDKK     | 153 |
|                       | : . * : * : * : *                                              |     |
| sp Q12794 HYAL1_HUMAN | VEAVAQDQFQGAARAWMAGTLQLGRALRPRLWGFYGFPCYNNDYDLS--PNTGQCPSG     | 224 |
| sp O35632 HYAL2_MOUSE | VMKQAQYEFQFAARQFMLNLTLYRVKAVRPQHLWGFYLFPCYNHDYVQNWESYTGRCPDV   | 230 |
| sp Q08169 HUGA_APIME  | VEQEAARRFEKYGLFMEETLKAAKRMRPAANWGYIAYPYCYNLTNPQ---PSAQCEAT     | 236 |
| sp P49370 HUGAA_VESVU | IELEASKRFEKYARFFMEETLKLAKKTRKQADWGYGYPCYCNMSPNN---LVPECDDVT    | 200 |
| Conohyal-Cn1          | LTKVAEKWQQAAKDIMSRLKIAQEVMPRGHWGYLYPRTWDN-----KRD              | 200 |
|                       | : * . : : . : * . * : * : *                                    |     |
| sp Q12794 HYAL1_HUMAN | IRAQNDQLGWLWGQSRALYPSIYMPAVLEGTGKSQMYVQHRVAEAFRVAVAAGD-PNLPV   | 283 |
| sp O35632 HYAL2_MOUSE | EVARNDDLAWLWAEASTALFSPVYLDLTLASSVHSRNFVSFRVREALRVAHTHHANHALPV  | 290 |
| sp Q08169 HUGA_APIME  | TMQENDKMSWLFESDVLPSVYLRWNLTSG-ERVGLVGGRVKEALRIARQMTTSRKKVL     | 295 |
| sp P49370 HUGAA_VESVU | AMHENDKMSWLFNNQNVLLPSVYVQELTDP-QRIGLVQGRVKEAVRISNNLKHS-PKVL    | 258 |
| Conohyal-Cn1          | TKFRNDKINWLWRQSTGLYPSIYIYDFSKTESAITKFVSDTVGEAVRVQKEFSP--PNTP   | 258 |
|                       | . * : : * : . * * : *                                          |     |
| sp Q12794 HYAL1_HUMAN | LPYVQIFYDTNHLPLDELEHSLGESAAQGAAGVVLWVS---WENTRTKESCQAIKEYM     | 340 |
| sp O35632 HYAL2_MOUSE | YVFTRTPTYTRGLTGLSQVDLISTIGESAAAGSAGVIFWGD--SEDASSMETCQYLKNYL   | 347 |
| sp Q08169 HUGA_APIME  | PYYWYKYQDRRDTDLSTRADLEATLRKITDLGADGFIWGS---SDDINTKAKCLQFREYL   | 352 |
| sp P49370 HUGAA_VESVU | SYWWVYQDETNTFLTETDVKKTFQEIIVNGGDGIIWGS---SSDVNSLSKCKRLQDYL     | 315 |
| Conohyal-Cn1          | IYPYVMFQTMDFIHYEDHLKISLGLSAKMGAGVVLWGTSKHYKESTRWQCCQLQEH       | 318 |
|                       | . : : . * . * : *                                              |     |
| sp Q12794 HYAL1_HUMAN | DTTLGPFILVTSGALLCSQALCSGHGRCVRRRTSHPKALLLNPAFSFIQ--LTPGGGPL    | 398 |
| sp O35632 HYAL2_MOUSE | TQLLVPIYINVSWATQYCSWTQCHGHGRCVRRNPSANTFLHLNASSFRLVPGHPTSEPQL   | 407 |
| sp Q08169 HUGA_APIME  | NNELGPAVKRIALNNNANDRLTVDVSDQV-----                             | 382 |
| sp P49370 HUGAA_VESVU | LTVLGP---IAIN-----VTEAVN-----                                  | 331 |
| Conohyal-Cn1          | RTVLGPLVKVTQMMTDCSRAICEGHGRCVHN---SHDVILGETESQRLSDLCSTRQSRF    | 375 |
|                       | * * : :                                                        |     |
| sp Q12794 HYAL1_HUMAN | SLRGALSLEDQAQMAVEFKRCRCYPGWQAPWCER-----KSMW-----               | 435 |
| sp O35632 HYAL2_MOUSE | RPEGQLSEADLNLYLQKHFRQCYLGWGGEQCQRNYKGAAGNASRAWAGSHLTSLLGLVAV   | 467 |
| sp Q08169 HUGA_APIME  | -----                                                          | 382 |
| sp P49370 HUGAA_VESVU | -----                                                          | 331 |
| Conohyal-Cn1          | RDYHCRCSAWEGACCQTLRPSRC---QKREQRNVHGGDLID-----                 | 415 |
|                       | -----                                                          |     |
| sp Q12794 HYAL1_HUMAN | -----                                                          | 435 |
| sp O35632 HYAL2_MOUSE | ALTWTL                                                         | 473 |
| sp Q08169 HUGA_APIME  | -----                                                          | 382 |
| sp P49370 HUGAA_VESVU | -----                                                          | 331 |
| Conohyal-Cn1          | -----                                                          | 415 |

**Supplementary Figure S2:** Comparison of amino acid sequences of hyaluronidases from human (Uniprot Accession code Q12794), mouse (Uniprot Accession code O35632), *Apis mellifera* (Uniprot Accession code Q08169), and *Vespula vulgaris* with the Conohyal-Cn1. For all sequences, the catalytic residue is highlighted in green, the positioning residues in blue, and the characterized glycosylation sites in orange. The Asn residue highlighted in pink in Conohyal-Cn1 sequence corresponds to a probable glycosylation site deduced from proteomic experiments and similarity with the established glycosylation site in the hyaluronidase from *Vespula vulgaris* venom.
